# Supplementary material for: Structural versatility of seven copper(ii) coordination polymers constructed with the long flexible ligand 1,4-bis(1,2,4-triazol-1-yl)butane
Source: Royal Society of Chemistry journal article supplement (doi:10.1039/c1ce05466j), 2011-01-01
Supplement: c1ce05466j.pdf [file c1ce05466j.pdf]

# Structural versatile of seven copper(II) coordination polymers constructed with long flexible ligand 1,4-bis(1,2,4-triazol-1-yl)butane

Xia Zhu, Li-Yan Wang, Xun-Gao Liu, Ju Wang, Bao-Long Li\* and Hai-Yan Li  
*Key Laboratory of Organic Synthesis of Jiangsu Province, College of Chemistry and  
Chemical Engineering and Materials Science, Soochow University, Suzhou 215123,  
P.R.China.*

**Table S1 Selected bond lengths [Å] and angles [°] for 1-7**

| <hr/>             |            |                  |            |
|-------------------|------------|------------------|------------|
| <b>1</b>          |            |                  |            |
| Cu(1)-N(3)        | 1.9854(19) | Cu(1)-O(1)       | 2.352(3)   |
| Cu(1)-O(2)        | 2.341(3)   | Cu(1)-O(3)       | 2.0182(18) |
| N(3)-Cu(1)-O(1)   | 89.35(5)   | N(3)-Cu(1)-O(2)  | 90.65(5)   |
| N(3)-Cu(1)-O(3)   | 88.31(8)   | O(2)-Cu(1)-O(1)  | 180.000(1) |
| O(3)-Cu(1)-O(1)   | 87.44(5)   | O(3)-Cu(1)-O(2)  | 92.56(5)   |
| N(3)-Cu(1)-N(3A)  | 178.70(11) | N(3)-Cu(1)-O(3A) | 91.63(8)   |
| O(3)-Cu(1)-O(3A)  | 174.88(10) |                  |            |
| <b>2</b>          |            |                  |            |
| Cu(1)-N(3)        | 2.0359(17) | Cu(1)-N(6A)      | 2.0069(17) |
| Cu(1)-Cl(1)       | 2.8029(7)  | N(3)-Cu(1)-Cl(1) | 89.93(5)   |
| N(3)-Cu(1)-N(6A)  | 90.89(7)   |                  |            |
| N(6A)-Cu(1)-Cl(1) | 91.89(5)   |                  |            |
| <b>3</b>          |            |                  |            |
| Cu(1)-N(3)        | 1.9975(13) | Cu(1)-N(4)       | 1.9661(14) |
| Cu(1)-S(1B)       | 2.9878(7)  | N(3)-Cu(1)-S(1B) | 88.48(4)   |
| N(3)-Cu(1)-N(4)   | 90.70(6)   |                  |            |
| N(4)-Cu(1)-S(1C)  | 98.02(5)   |                  |            |
| <b>4</b>          |            |                  |            |
| Cu(1)-N(3)        | 2.012(3)   | Cu(1)-O(1)       | 2.407(4)   |

|                   |            |                   |            |
|-------------------|------------|-------------------|------------|
| N(3)-Cu(1)-N(3A)  | 90.03(17)  | N(3)-Cu(1)-N(3B)  | 175.92(15) |
| N(3)-Cu(1)-N(3C)  | 90.11(17)  | O(1)-Cu(1)-O(1C)  | 180.0      |
| N(3)-Cu(1)-O(1)   | 92.04(7)   |                   |            |
|                   |            | <b>5</b>          |            |
| Cu(1)-N(3)        | 2.012(4)   | Cu(1)-O(1)        | 2.400(5)   |
| N(3)-Cu(1)-N(3A)  | 179.31(18) | N(3)-Cu(1)-N(3B)  | 90.2(2)    |
| N(3)-Cu(1)-N(3C)  | 89.8(2)    | O(1)-Cu(1)-O(1C)  | 180.0      |
| N(3)-Cu(1)-O(1)   | 90.35(9)   |                   |            |
|                   |            | <b>6</b>          |            |
| Cu(1)-O(1)        | 1.9685(17) | Cu(1)-N(3)        | 2.0034(19) |
| O(1)-Cu(1)-N(3)   | 90.64(8)   | O(1A)-Cu(1)-N(3)  | 89.36(8)   |
|                   |            | <b>7</b>          |            |
| Cu(1)-O(1)        | 2.196(3)   | Cu(1)-O(5A)       | 1.943(3)   |
| Cu(1)-O(7B)       | 2.019(3)   | Cu(1)-O(9)        | 1.999(4)   |
| Cu(1)-N(3)        | 1.980(4)   | Cu(2)-O(2C)       | 1.954(3)   |
| Cu(2)-O(3)        | 1.971(3)   | Cu(2)-O(10)       | 2.002(3)   |
| Cu(2)-O(11)       | 2.361(4)   | Cu(2)-N(6)        | 2.001(4)   |
| O(5A)-Cu(1)-O(1)  | 87.36(13)  | O(7B)-Cu(1)-O(1)  | 96.41(15)  |
| O(9)-Cu(1)-O(1)   | 106.2(2)   | O(5A)-Cu(1)-O(7B) | 88.20(12)  |
| O(5A)-Cu(1)-O(9)  | 91.01(16)  | O(9)-Cu(1)-O(7B)  | 157.32(19) |
| N(3)-Cu(1)-O(1)   | 96.14(14)  | O(5A)-Cu(1)-N(3)  | 175.97(15) |
| N(3)-Cu(1)-O(7B)  | 93.40(14)  | N(3)-Cu(1)-O(9)   | 86.09(17)  |
| O(2C)-Cu(2)-O(3)  | 85.92(13)  | O(2C)-Cu(2)-O(10) | 174.58(13) |
| O(2C)-Cu(2)-O(11) | 87.42(15)  | O(3)-Cu(2)-O(10)  | 88.66(14)  |
| O(3)-Cu(2)-O(11)  | 101.02(15) | O(10)-Cu(2)-O(11) | 93.36(16)  |
| O(2C)-Cu(2)-N(6)  | 99.04(14)  | O(3)-Cu(2)-N(6)   | 170.93(15) |
| N(6)-Cu(2)-O(10)  | 86.37(15)  | N(6)-Cu(2)-O(11)  | 86.86(15)  |

---

Symmetry codes: **1** A  $-x+1, y, -z+3/2$ ; B  $-x+1/2, -y+1/2, -z+2$ ; **2** A  $x+1, -y+1/2, z-1/2$ ; B  $-x, y+1/2, -z+1/2$ , C  $-x+1, -y+1, -z$ ; **3** A  $-x+2, -y, -z+2$ ; B  $x, -y+1/2, z+1/2$ ; C  $-x+2, y-1/2, -z+3/2$ ; **4** A  $-x+5/4, -y+1/4, z$ ; B  $-x+5/4, y, -z+1/4$ ; C  $x, -y+1/4, -z+1/4$ ; **5** A  $-x+5/4, y, -z+1/4$ ; B  $x, -y+1/4, -z+1/4$ ; C  $-x+5/4, -y+1/4, z$ ; **6** A  $-x+1, -y, -z$ ; **7** A  $x+1, y+1, z$ ; B  $x, y+1, z$ ; C  $x-1, y, z$ .

**Table S2. Hydrogen bonds for 1 (Å and °)**

| D-H...A                        | d(D-H)  | d(H...A) | d(D...A) | <(DHA) |
|--------------------------------|---------|----------|----------|--------|
| O(1)-H(1W)...O(4) <sup>a</sup> | 0.85(3) | 1.95(3)  | 2.797(3) | 171(3) |
| O(2)-H(2W)...O(4) <sup>b</sup> | 0.79(3) | 2.01(3)  | 2.790(3) | 166(4) |

Symmetry transformations used to generate equivalent atoms: a x, -y+1, z-1/2; b x, -y, z-1/2.

**Table S3. Hydrogen bonds for 4 (Å and °)**

| D-H...A                        | d(D-H)  | d(H...A) | d(D...A) | <(DHA) |
|--------------------------------|---------|----------|----------|--------|
| O(1)-H(1W)...O(2)              | 0.71(4) | 2.13(4)  | 2.827(6) | 168(5) |
| O(1)-H(1W)...O(5) <sup>a</sup> | 0.71(4) | 2.18(5)  | 2.87(2)  | 160(5) |

Symmetry transformations used to generate equivalent atoms: a -x+3/4, -y-1/4, z.

**Table S4. Hydrogen bonds for 4 (Å and °)**

| D-H...A                        | d(D-H)  | d(H...A) | d(D...A) | <(DHA) |
|--------------------------------|---------|----------|----------|--------|
| O(1)-H(1W)...O(2) <sup>a</sup> | 0.74(6) | 2.10(6)  | 2.772(7) | 151(6) |
| O(1)-H(1W)...O(3) <sup>b</sup> | 0.74(6) | 2.43(7)  | 3.14(3)  | 162(6) |
| O(1)-H(1W)...O(6) <sup>b</sup> | 0.74(6) | 2.05(7)  | 2.76(3)  | 163(6) |

Symmetry transformations used to generate equivalent atoms: a x-1/2, y-1/2, z; b -x+5/4, -y+1/4, z.

**Table S5. Hydrogen bonds for 7 (Å and °)**

| D-H...A                          | d(D-H)  | d(H...A) | d(D...A) | <(DHA) |
|----------------------------------|---------|----------|----------|--------|
| O(9)-H(1W)...O(13) <sup>a</sup>  | 0.78(4) | 1.93(6)  | 2.630(9) | 150(8) |
| O(9)-H(2W)...O(6) <sup>b</sup>   | 0.78(5) | 2.25(7)  | 2.742(6) | 121(7) |
| O(9)-H(2W)...O(13)               | 0.78(5) | 2.33(5)  | 3.053(9) | 155(8) |
| O(10)-H(3W)...O(4)               | 0.85(4) | 1.71(4)  | 2.547(5) | 168(6) |
| O(10)-H(4W)...O(7) <sup>c</sup>  | 0.90(4) | 1.83(5)  | 2.714(5) | 165(7) |
| O(11)-H(6W)...O(11) <sup>d</sup> | 0.80(4) | 2.00(5)  | 2.784(9) | 168(9) |

Symmetry transformations used to generate equivalent atoms: a -x+2, -y+2, -z+2; b x+1, y+1, z; c x, y+1, z; d -x, -y+1, -z+1.



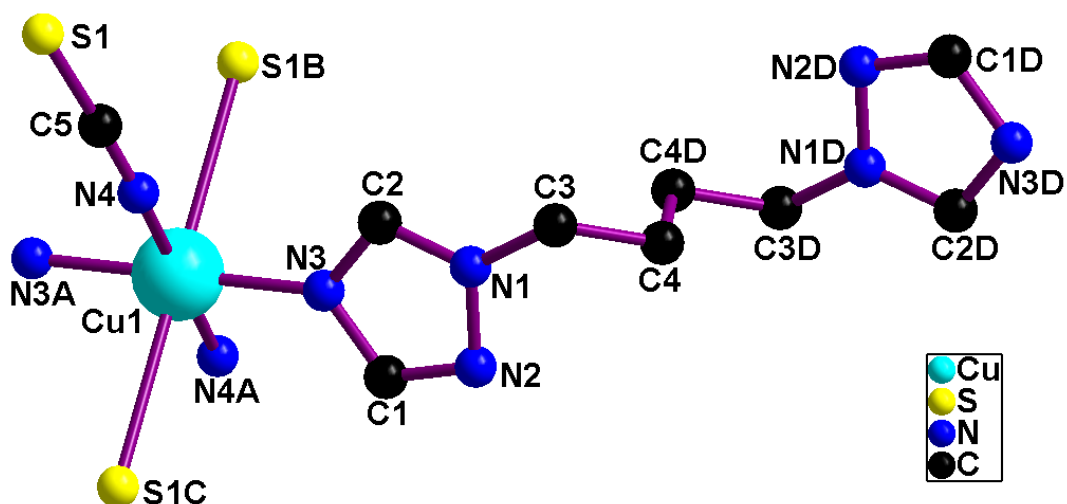

Fig. S3 The coordination environment of the Cu(II) atom of 3.

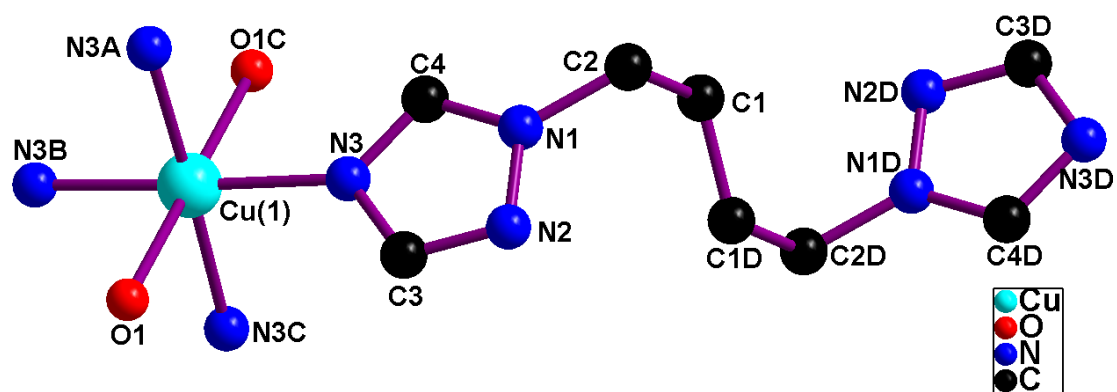

Fig. S4 The coordination environment of the Cu(II) atom of 4. *Cu*tbClO<sub>4</sub>

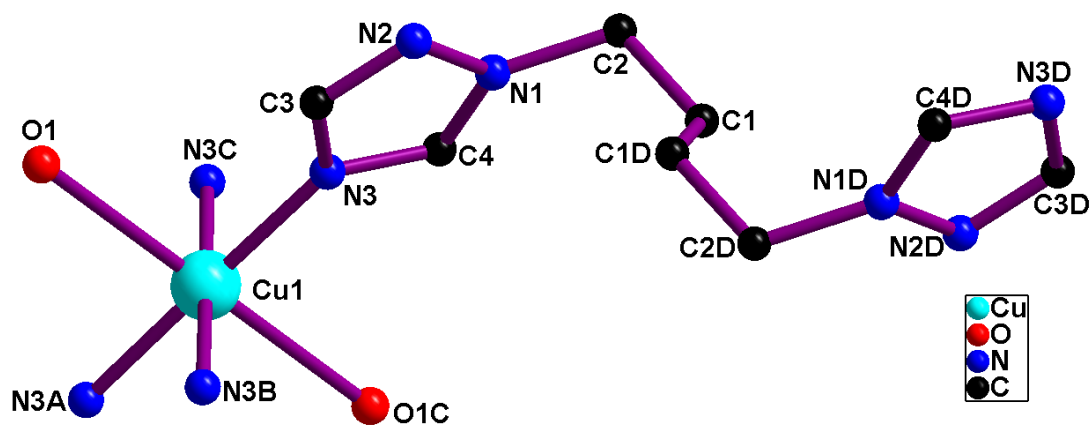

Fig. S5 The coordination environment of the Cu(II) atom of 5.

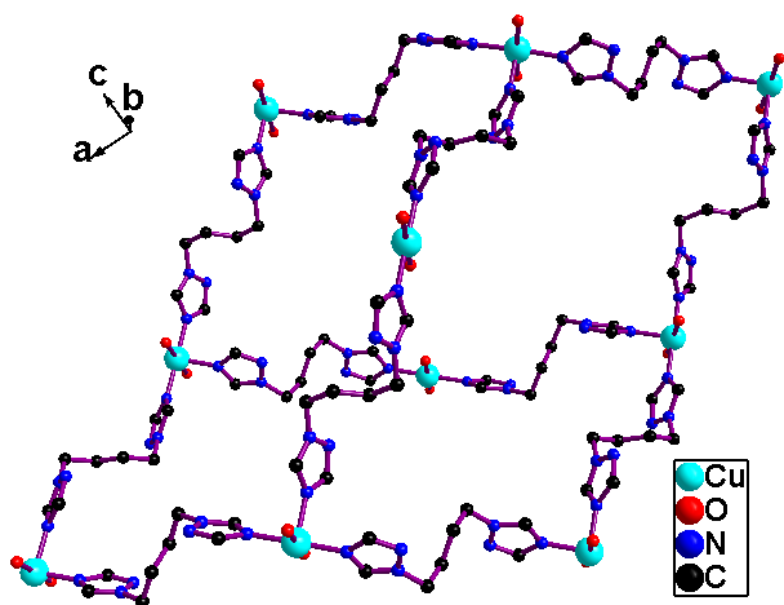

Fig. S6 Single adamantanoid cage of 4 and 5.

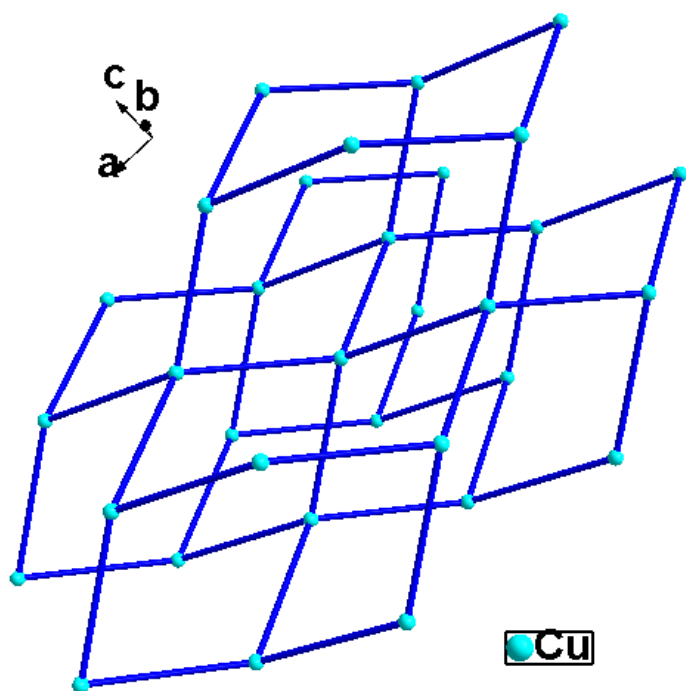

Fig. S7 Schematic depiction of a single diamondoid network of 4 and 5.

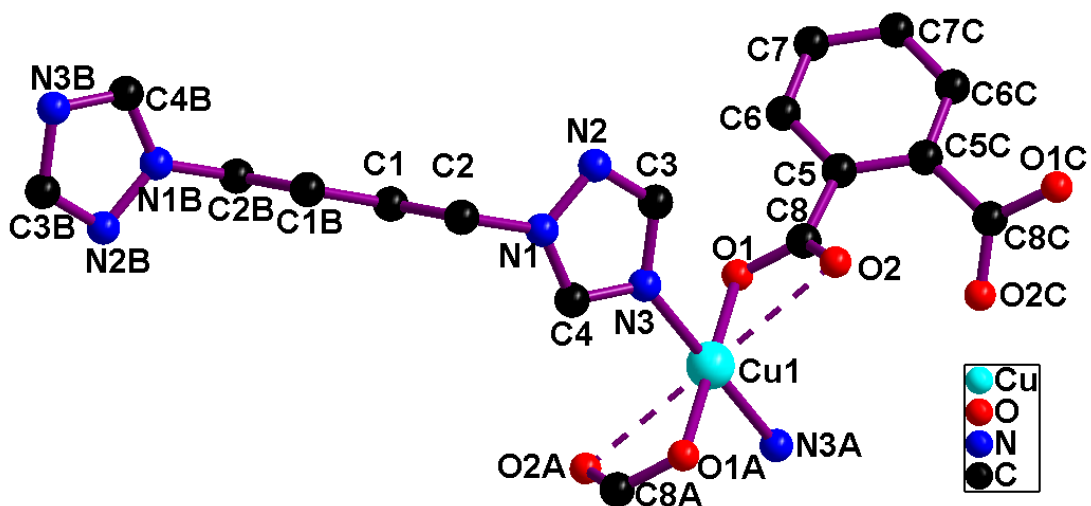

Fig. S8 The coordination environment of Cu(II) atom of 6.

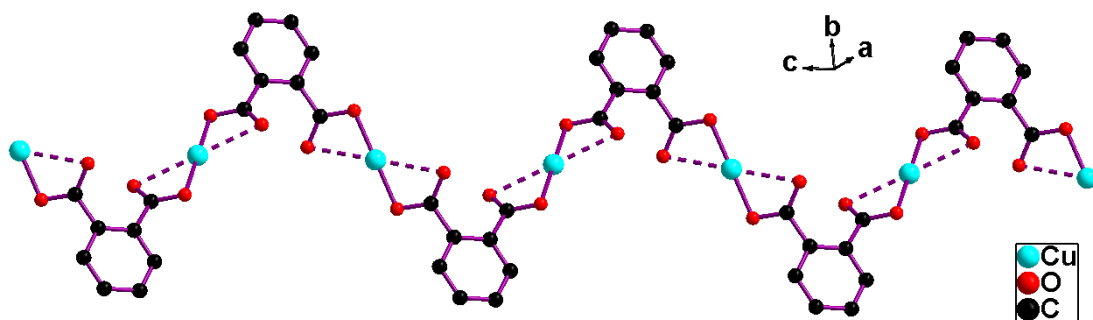

Fig. S9 A 1D  $[Cu(bdc)]_n$  chain of 6.

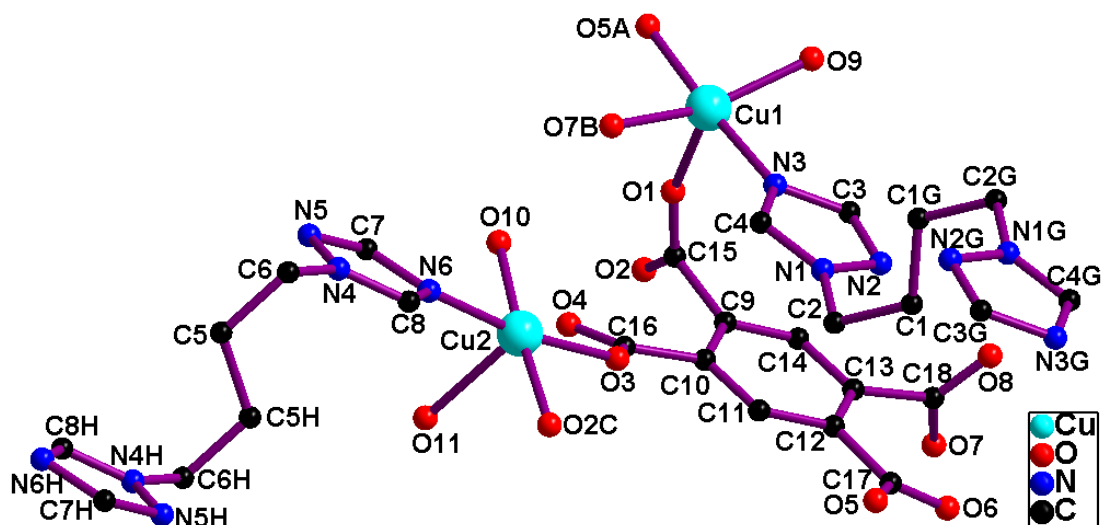

Fig. S10 The coordination environment of two Cu(II) atoms of 7.

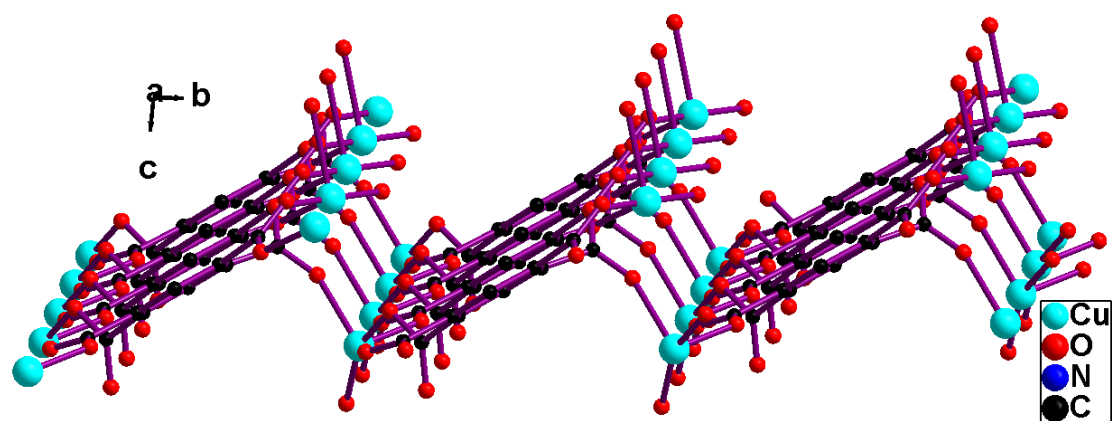

Fig. S11 Viewing a 2D  $[\text{Cu}_2(\text{btec})(\text{H}_2\text{O})_3]_n$  network of **7** along the *a* direction.

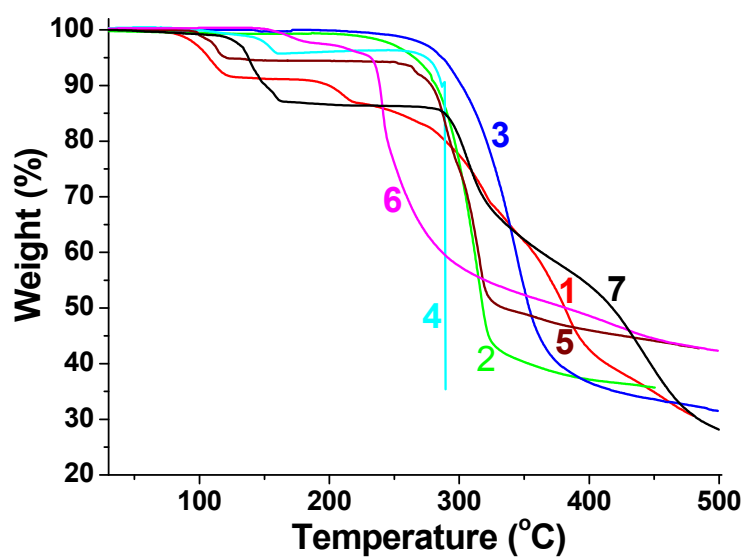

Fig. S12 TG curves of complexes **1-7**.
